# Supplementary material
Source: MDPI journal article supplement (https://www.mdpi.com/2079-6412/11/9/1137)
Supplement: s1 [file s1]

# Supplementary Materials: Three-Dimensional Carbon-Coated LiFePO<sub>4</sub> Cathode with Improved Li-Ion Battery Performance

Can Wang <sup>1,†</sup>, Xunlong Yuan <sup>2,†</sup>, Huiyun Tan <sup>2</sup>, Shuofeng Jian <sup>2</sup>, Ziting Ma <sup>2</sup>, Junjie Zhao <sup>3</sup>, Xuewen Wang <sup>3,\*</sup>, Dapeng Chen <sup>1,\*</sup> and Yifan Dong <sup>2,\*</sup>

<sup>1</sup> Wuhan Institute of Marine Electric Propulsion, China Shipbuilding Industry Corporation, Wuhan 430074, China; canwang-scola@whu.edu.cn

<sup>2</sup> Engineering Research Center of Nano-Geomaterials of Ministry of Education, Faculty of Material Science and Chemistry, China University of Geosciences, Wuhan 430074, China; linsimei98@126.com (X.Y.); thy98\_cug@163.com (H.T.); JianShuofeng@163.com (S.J.); maziting17@126.com (Z.M.)

<sup>3</sup> State Key Laboratory of Advanced Technology for Materials Synthesis and Processing, Wuhan University of Technology, Wuhan 430070, China; junjiezhao@whut.edu.cn

\* Correspondence: xwwang@whut.edu.cn (X.W.); dpchenhust@gmail.com (D.C.); dongyf@cug.edu.cn (Y.D.)

† These authors contributed equally to this work.

**Citation:** Wang, C.; Yuan, X.; Tan, H.; Jian, S.; Ma, Z.; Zhao, J.; Wang, X.; Chen, D.; Dong, Y. Three-Dimensional Carbon-Coated LiFePO<sub>4</sub> Cathode with Improved Li-Ion Battery Performance. *Coatings* **2021**, *11*, 1137. <https://doi.org/10.3390/coatings11091137>

Academic Editor: Octavian Buiu

Received: 18 August 2021

Accepted: 13 September 2021

Published: 18 September 2021

**Publisher's Note:** MDPI stays neutral with regard to jurisdictional claims in published maps and institutional affiliations.

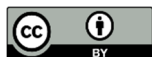

**Copyright:** © 2021 by the authors. Licensee MDPI, Basel, Switzerland. This article is an open access article distributed under the terms and conditions of the Creative Commons Attribution (CC BY) license (<http://creativecommons.org/licenses/by/4.0/>).

**Table S1.** Specific capacity of different cathode materials for lithium-ion batteries.

| Cathode Materials                                                              | Specific Capacity           | Current Density       | Ref.     |
|--------------------------------------------------------------------------------|-----------------------------|-----------------------|----------|
| 3D porous LiFePO <sub>4</sub> /graphene                                        | 146 m·A·h·g <sup>-1</sup>   | 17 mA·g <sup>-1</sup> | [1]      |
| Amorphous FePO <sub>4</sub> /graphene                                          | 156 m·A·h·g <sup>-1</sup>   | 25 mA·g <sup>-1</sup> | [2]      |
| LiCoO <sub>2</sub>                                                             | 180 m·A·h·g <sup>-1</sup>   | 47 mA·g <sup>-1</sup> | [3]      |
| Li <sub>x</sub> Co <sub>2</sub> O <sub>4</sub> coated LiCoO <sub>2</sub>       | 140 m·A·h·g <sup>-1</sup>   | 3 C                   | [4]      |
| Mg and P coated LiCoO <sub>2</sub>                                             | 120 m·A·h·g <sup>-1</sup>   | 10 C                  | [5]      |
| LiNi <sub>0.5</sub> Mn <sub>0.5</sub> O <sub>2</sub> coated LiCoO <sub>2</sub> | 148 m·A·h·g <sup>-1</sup>   | 1 C                   | [5]      |
| Carbon-coated LiFePO <sub>4</sub>                                              | 109 m·A·h·g <sup>-1</sup>   | 2 C                   | [6]      |
| LiFePO <sub>4</sub> /nitrogen-doped carbon networks                            | 161.5 m·A·h·g <sup>-1</sup> | 0.1 C                 | [7]      |
| 3D carbon-coated LiFePO <sub>4</sub>                                           | 157 m·A·h·g <sup>-1</sup>   | 2 C                   | Our work |

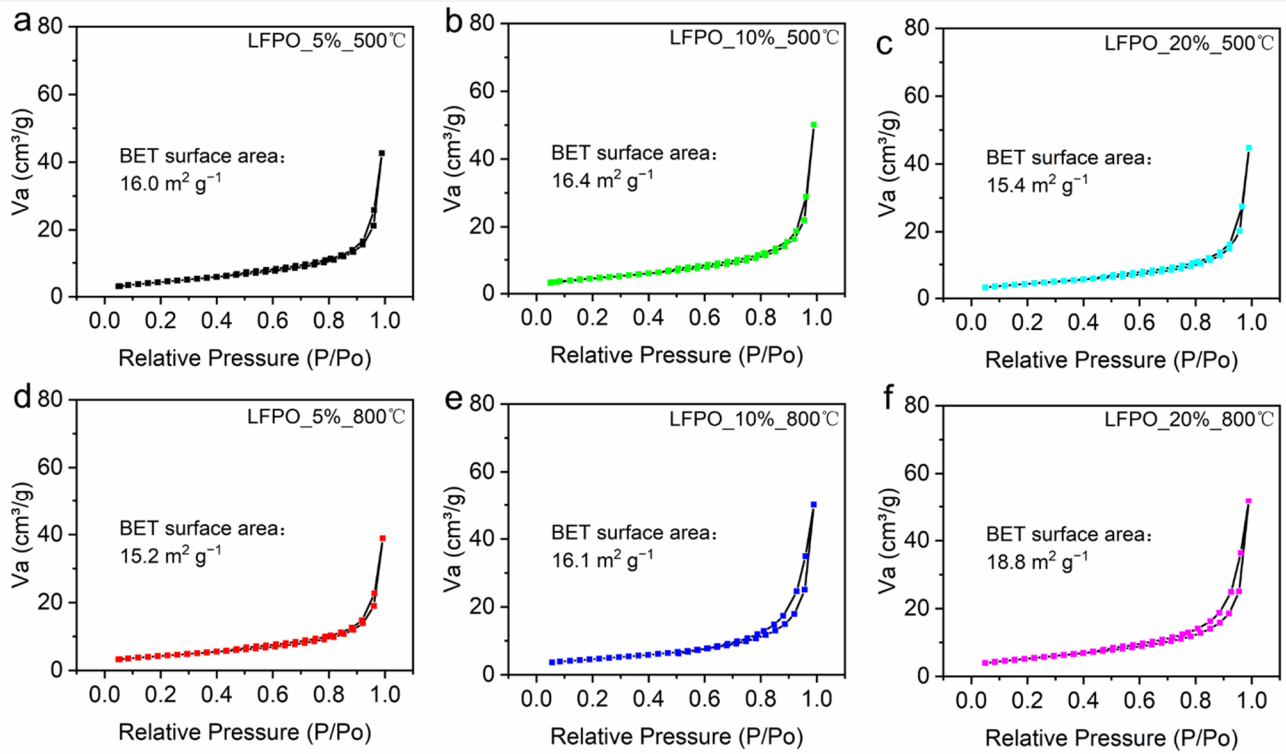**Figure S1.** Nitrogen adsorption-desorption isotherms of (a) LFPO\_5%\_500 °C, (b) LFPO\_10%\_500 °C, (c) LFPO\_20%\_500 °C, (d) LFPO\_5%\_800 °C, (e) LFPO\_10%\_800 °C and (f) LFPO\_20%\_800 °C.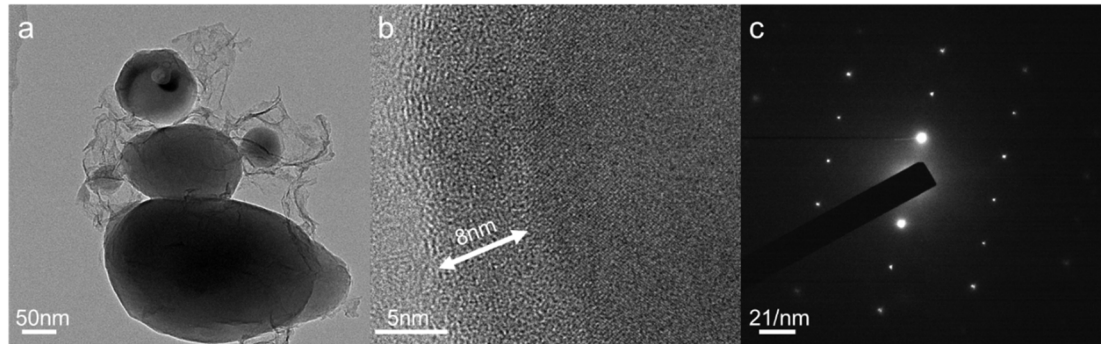**Figure S2.** (a) TEM images of LFPO\_15%\_800 °C; (b) HRTEM images LFPO\_15%\_800 °C; (c) the corresponding SAED of LFPO\_15%\_800 °C.

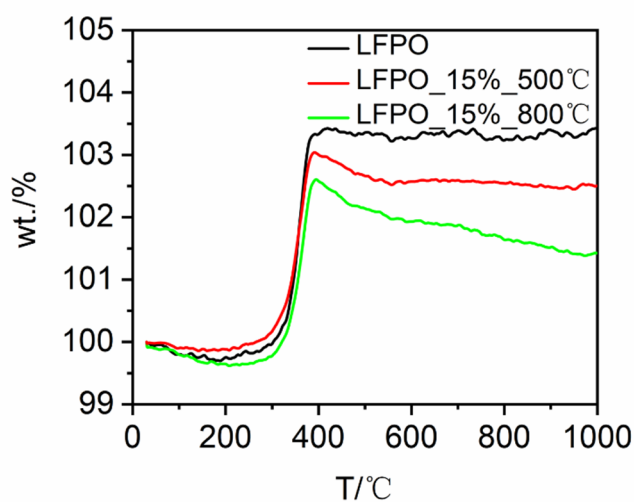

**Figure S3.** TG curve of LFPO, LFPO\_15%\_500 °C and LFPO\_15%\_800 °C.

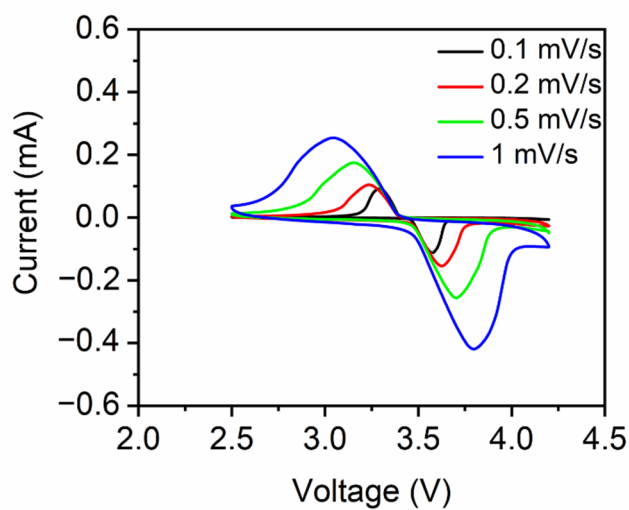

**Figure S4.** Cyclic voltammograms of LFPO\_15%\_800 °C at various scan rates from 0.1 to 1.0 mV s<sup>-1</sup> in a voltage range of 2.5–4.2 V.

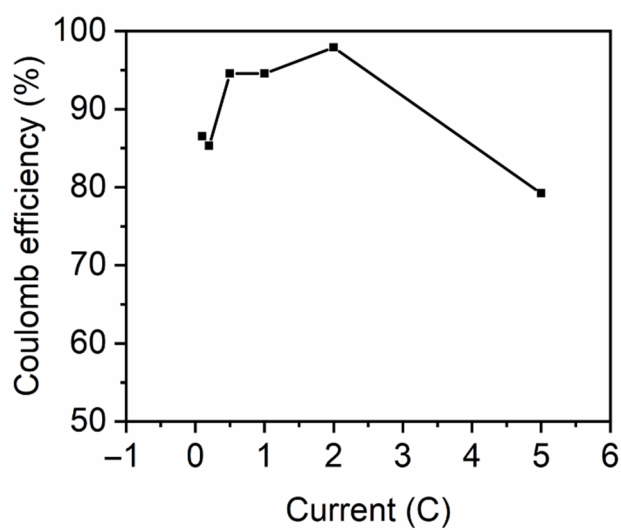

**Figure S5.** Coulomb efficiency at all C rates.

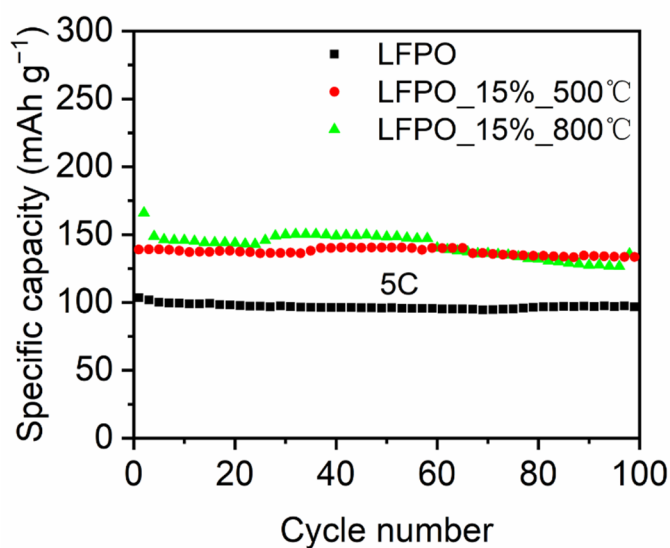

**Figure S6.** Cyclic performance of LFPO, LFPO\_15%\_500 °C and LFPO\_15%\_800 °C at 5 C.

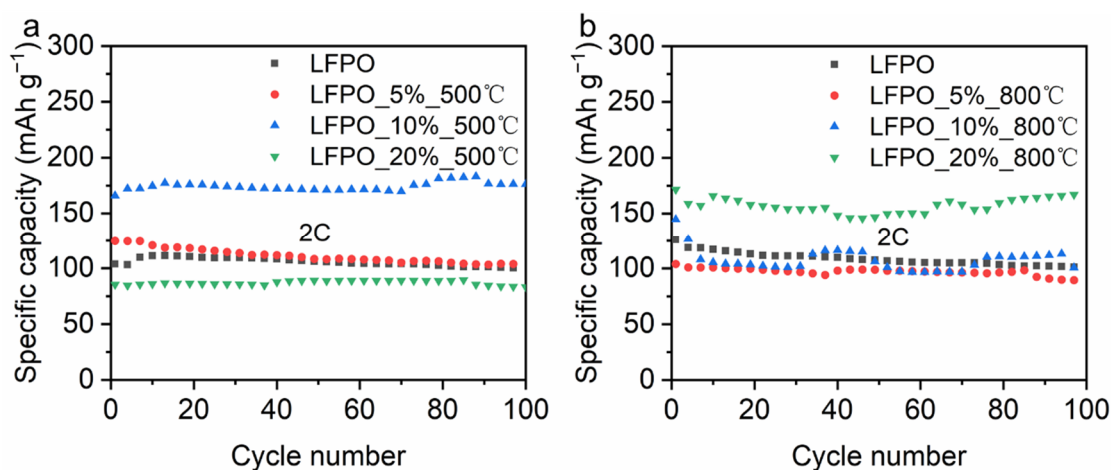

**Figure S7.** (a) Cyclic performance of LFPO, LFPO\_5%\_500 °C, LFPO\_10%\_500 °C and LFPO\_20%\_500 °C at 2 C; (b) Cyclic performance of LFPO, LFPO\_5%\_800 °C, LFPO\_10%\_800 °C and LFPO\_20%\_800 °C at 2 C.

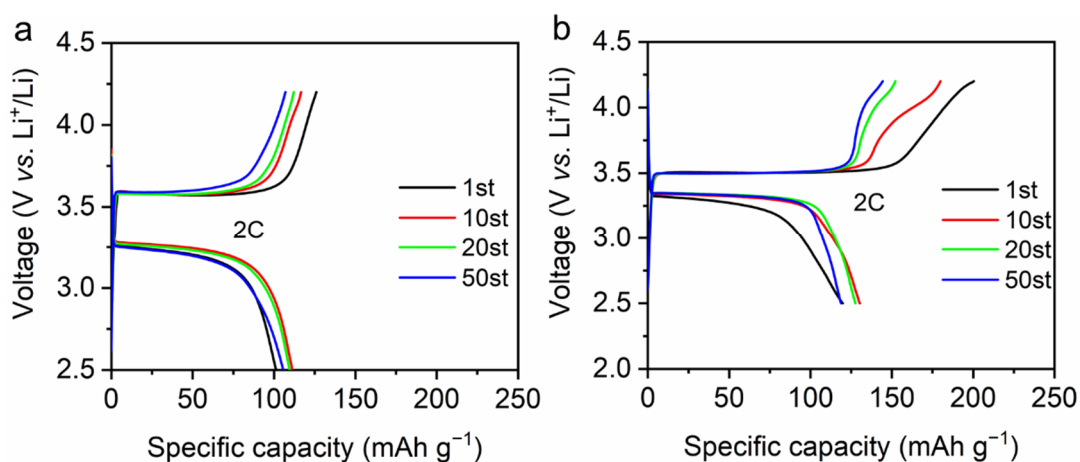

**Figure S8.** Galvanostatic charge and discharge curves of (a) LFPO and (b) LFPO\_15%\_500 °C at the current of 2 C.

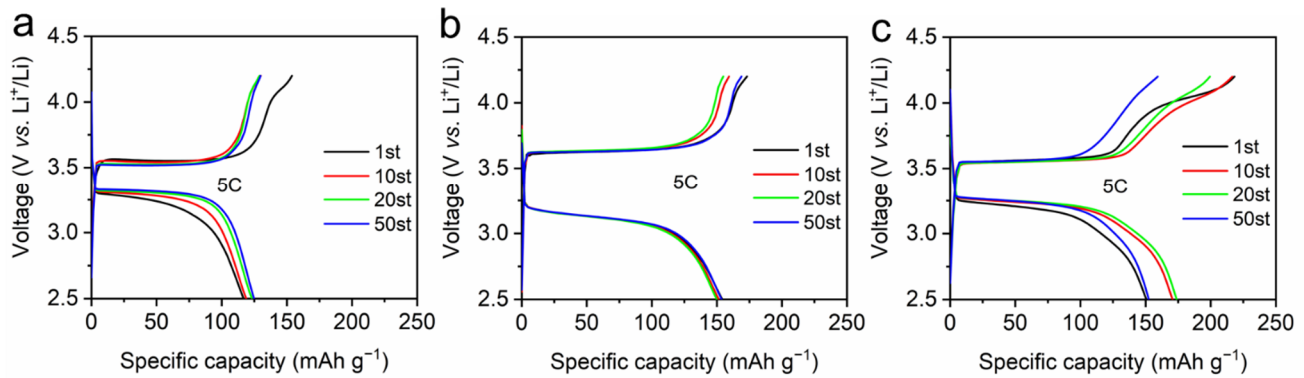

**Figure S9.** Galvanostatic charge and discharge curves of (a) LFPO, (b) LFPO\_15%\_500 °C and (c) LFPO\_15%\_800 °C at the current of 5 C.

**Table S2.** Fitting data of LFPO, LFPO\_15%\_500 °C and LFPO\_15%\_800 °C equivalent circuit components.

| Title           | $R_e$ | CPE1     | $R_{ct}$               | CPE2                   | $R_f$ | $Z_w$    |
|-----------------|-------|----------|------------------------|------------------------|-------|----------|
| LFPO            | 1.375 | 0.00302  | $1.396 \times 10^{12}$ | $2.954 \times 10^{-6}$ | 64.05 | 0.001849 |
| LFPO_15%_500 °C | 1.534 | 0.002279 | $4.434 \times 10^5$    | $3.063 \times 10^{-6}$ | 57.13 | 0.00227  |
| LFPO_15%_800 °C | 1.78  | 0.002339 | $4.695 \times 10^4$    | $2.746 \times 10^{-6}$ | 49.37 | 0.004449 |

**Table S3.** The definitions of Nomenclature, Greek symbols, subscripts, superscripts, and acronyms.

| Symbol          | Define                                                                                                                                                        |
|-----------------|---------------------------------------------------------------------------------------------------------------------------------------------------------------|
| LIB             | Lithium-ion battery                                                                                                                                           |
| HEV             | Hybrid electric vehicles                                                                                                                                      |
| PHEV            | Plug-in hybrid electric vehicles                                                                                                                              |
| EV              | Electric vehicles                                                                                                                                             |
| LFPO            | Lithium iron phosphate                                                                                                                                        |
| LFPO_15%_500 °C | Lithium iron phosphate was doped with cetyltrimethyl Ammonium Bromide, which accounted for 15% of the mass fraction, and the sintering temperature was 500 °C |
| 1 M             | 1 mol/L                                                                                                                                                       |
| w%              | Volume fraction                                                                                                                                               |
| GF/A            | Type of diaphragm                                                                                                                                             |
| EIS             | Electrochemical impedance spectra                                                                                                                             |
| SEI             | Solid electrolyte interphase                                                                                                                                  |
| OCV             | Open circuit voltage                                                                                                                                          |

**Table S4.** The definitions of various abbreviations.

| Abbreviations | Define                                           |
|---------------|--------------------------------------------------|
| GO            | Graphene oxide                                   |
| CTAB          | Cetyltrimethyl Ammonium Bromide                  |
| Bis-GMA       | Bisphenol A glycidyl dimethacrylate              |
| PAN           | Polyacrylonitrile                                |
| XRD           | X-ray diffraction                                |
| FESEM         | Field-emission scanning electron microscopy      |
| EDS           | Energy dispersive X-ray spectra                  |
| BET           | Brurauer-Emmerr-Teller                           |
| TEM           | Transmission electron microscopy                 |
| HRTEM         | High-resolution transmission electron microscopy |
| SAED          | Selected area electron diffraction               |
| EC            | Ethylene carbonate                               |
| DMC           | Dimethyl carbonate                               |
| PVDF          | Polyvinylidene fluoride                          |

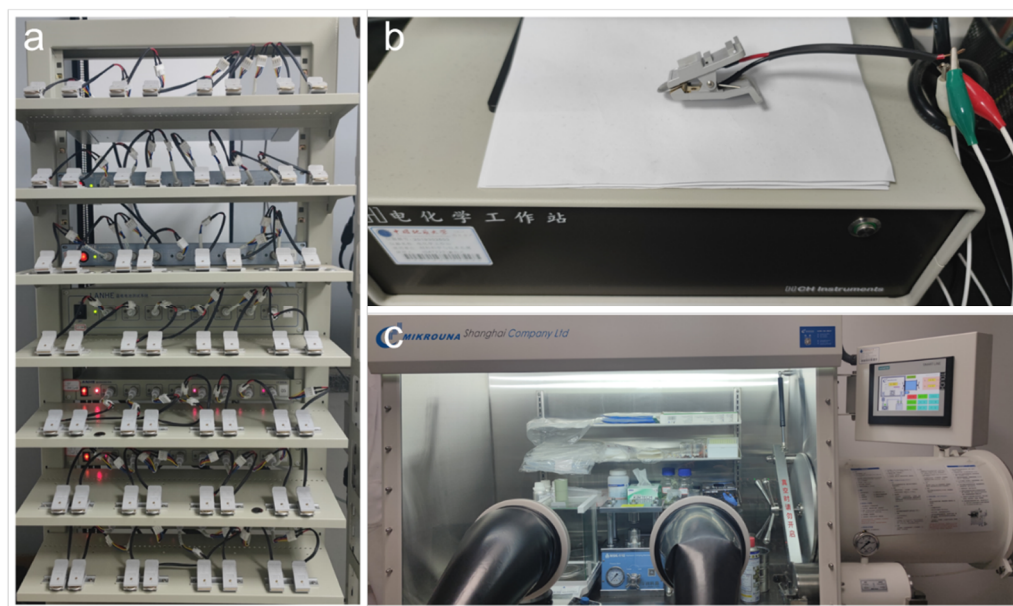

**Figure S10.** (a) Physical drawing of cyclic performance test, (b) Physical drawing of CV test and EIS test, (c) Physical drawing of the battery assembly.

**Table S5.** The various technical parameters of the work.

| Technical Types   | Technical Specifications                                                                                 |
|-------------------|----------------------------------------------------------------------------------------------------------|
| nominal voltage   | 2.5–4.2V                                                                                                 |
| nominal capacity  | 170 m·A·h·g <sup>-1</sup>                                                                                |
| anode             | Li film                                                                                                  |
| cathode           | LiFeO <sub>4</sub>                                                                                       |
| electrolyte       | 1 M solution of LiPF <sub>6</sub> in ethylene carbonate (EC)/dimethyl carbonate (DMC) (EC:DMC = 1:1, w%) |
| separator         | GF/A                                                                                                     |
| battery case      | 2016                                                                                                     |
| current collector | aluminum foil                                                                                            |

## References

1. Yang, J.; Wang, J.; Wang, D.; Li, X.; Geng, D.; Liang, G.; Gauthier, M.; Li, R.; Sun, X. 3D porous LiFePO<sub>4</sub>/graphene hybrid cathodes with enhanced performance for Li-ion batteries. *J. Power Sources* **2012**, *208*, 340–344.
2. Kim, H.; Kim, S.W.; Hong, J.; Lim, H.D.; Kim, H.S.; Yoo, J.K.; Kang, K.J.J.o.t.E.S. Graphene-based hybrid electrode material for high-power lithium-ion batteries. *J. Electrochem. Soc.* **2011**, *158*, A930–A935.
3. Chen, Z.; Dahn, J.R. Improving the capacity retention of LiCoO<sub>2</sub> cycled to 4.5 V by heat-treatment. *Electrochem. Solid-State Lett.* **2004**, *7*, A11–A14.
4. Shim, J.-H.; Lee, K.-S.; Missyul, A.; Lee, J.; Linn, B.; Lee, E.C.; Lee, S. Characterization of spinel Li<sub>1-x</sub>Co<sub>2</sub>O<sub>4</sub>-Coated LiCoO<sub>2</sub> prepared with post-thermal treatment as a cathode material for lithium ion batteries. *Chem. Mater.* **2015**, *27*, 3273–3279.
5. Kalluri, S.; Yoon, M.; Jo, M.; Park, S.; Myeong, S.; Kim, J.; Dou, S.X.; Guo, Z.; Cho, J. Surface engineering strategies of layered LiCoO<sub>2</sub> cathode material to realize high-energy and high-voltage Li-ion cells. *Adv. Energy Mater.* **2017**, *7*, 601507.
6. Wu, Y.; Wen, Z.; Li, J. Hierarchical carbon-coated LiFePO<sub>4</sub> nanoplate microspheres with high electrochemical performance for Li-ion batteries. *Adv. Mater.* **2011**, *23*, 1126–1129.
7. Liu, Y.; Gu, J.; Zhang, J.; Yu, F.; Dong, L.; Nie, N.; Li, W. Metal organic frameworks derived porous lithium iron phosphate with continuous nitrogen-doped carbon networks for lithium ion batteries. *J. Power Sources* **2016**, *304*, 42–50.
